# Supplementary material for: Prognostic Value of Interleukin-32 Expression and Its Correlation with the Infiltration of Natural Killer Cells in Cutaneous Melanoma
Source: MDPI journal article supplement (doi:10.3390/jcm10204691), 2021-10-13

**Supplementary Table S1.** The cox regression results of *IL32* expression in SKCM and LIHC.

**KM plot data using TIMER version 1.0 ( $p < 0.05$ )**

|               | SKCM   |       |                |                  |             |             | LIHC   |       |                |                  |             |             |
|---------------|--------|-------|----------------|------------------|-------------|-------------|--------|-------|----------------|------------------|-------------|-------------|
|               | coef   | HR    | 95% CI<br>_low | 95% CI<br>_upper | P-<br>value | significant | coef   | HR    | 95% CI<br>_low | 95% CI<br>_upper | P-<br>value | significant |
| <b>Purity</b> | -0.218 | 0.804 | 0.339          | 1.907            | 0.621       |             | 0.487  | 1.627 | .660           | 4.012            | 0.290       |             |
| <b>IL32</b>   | -0.252 | 0.777 | 0.691          | 0.874            | 0.000       | ***         | -0.103 | 0.903 | 0.784          | 1.039            | 0.155       |             |
| <b>Age</b>    | 0.018  | 1.018 | 1.008          | 1.029            | 0.000       | ***         | 0.011  | 1.011 | 0.995          | 1.027            | 0.174       |             |
| <b>Stage2</b> | 0.131  | 1.140 | 0.736          | 1.765            | 0.558       |             | 0.312  | 1.367 | 0.811          | 2.305            | 0.241       |             |
| <b>Stage3</b> | 0.528  | 1.696 | 1.134          | 2.538            | 0.010       | *           | 0.944  | 2.57  | 1.623          | 4.067            | 0           | ***         |
| <b>Stage4</b> | 1.352  | 3.866 | 1.935          | 7.725            | 0           | ***         | 1.582  | 4.862 | 1.441          | 16.402           | 0.011       | *           |
| <b>Gender</b> | -0.065 | 0.937 | 0.686          | 1.279            | 0.682       |             | -0.101 | 0.904 | 0.574          | 1.424            | 0.664       |             |
| <b>Race</b>   | -1.386 | 0.250 | 0.114          | 0.550            | 0.001       | **          | -0.031 | 0.969 | 0.608          | 1.546            | 0.896       |             |

\* $p < 0.01$ ; \*\* $p < 0.001$ ; \*\*\* $p < 0.0001$ .

**KM plot data using TIMER version 2.0 ( $p < 0.05$ ,  $Z < 0$ )**

|               | SKCM       |       |              |                |                  |             |             |                 | LIHC       |       |              |                |                  |             |             |                 |
|---------------|------------|-------|--------------|----------------|------------------|-------------|-------------|-----------------|------------|-------|--------------|----------------|------------------|-------------|-------------|-----------------|
|               | coef       | HR    | Se<br>(coef) | 95% CI<br>_low | 95% CI<br>_upper | Z-<br>value | P-<br>value | significa<br>nt | coef       | HR    | Se<br>(coef) | 95% CI<br>_low | 95% CI<br>_upper | Z-<br>value | P-<br>value | significan<br>t |
| <b>Purity</b> | -0.20<br>3 | 0.816 | 0.442        | 0.343          | 1.94             | -0.46       | 0.645       |                 | 0.52       | 1.683 | 0.458        | 0.686          | 4.129            | 1.136       | 0.256       |                 |
| <b>IL32</b>   | -0.25<br>1 | 0.778 | 0.06         | 0.691          | 0.875            | -4.17<br>5  | 0           | ***             | -0.09<br>7 | 0.908 | 0.071        | 0.789          | 1.044            | -1.35<br>2  | 0.176       |                 |
| <b>Age</b>    | 0.018      | 1.018 | 0.005        | 1.008          | 1.029            | 3.393       | 0.001       | **              | 0.012      | 1.012 | 0.008        | 0.997          | 1.028            | 1.523       | 0.128       |                 |
| <b>Stage2</b> | 0.111      | 1.117 | 0.224        | 0.72           | 1.734            | 0.495       | 0.621       |                 | 0.319      | 1.376 | 0.262        | 0.823          | 2.3              | 1.219       | 0.223       |                 |
| <b>Stage3</b> | 0.522      | 1.686 | 0.206        | 1.127          | 2.523            | 2.54        | 0.011       | *               | 0.944      | 2.57  | 0.234        | 1.623          | 4.067            | 4.028       | 0           | ***             |
| <b>Stage4</b> | 1.352      | 3.866 | 0.353        | 1.935          | 7.714            | 3.824       | 0           | ***             | 1.55       | 4.71  | 0.619        | 1.399          | 15.862           | 2.502       | 0.012       | *               |
| <b>Gender</b> | -0.07<br>5 | 0.928 | 0.159        | 0.679          | 1.268            | -0.46<br>9  | 0.639       |                 | -0.09<br>1 | 0.913 | 0.029        | 0.583          | 1.43             | -0.39<br>7  | 0.691       |                 |
| <b>Race</b>   | -1.40<br>1 | 0.246 | 0.403        | 0.112          | 0.542            | -3.48       | 0.001       | **              | -0.00<br>1 | 0.999 | 0.236        | 0.629          | 1.587            | -0.00<br>5  | 0.996       |                 |

\* $p < 0.01$ ; \*\* $p < 0.001$ ; \*\*\* $p < 0.0001$ .

**Supplementary Table S2.** Statistical tests used in Figures and Supplementary data.

| Figure   | Database          | Object                            | Method                             | Sample                                                                  | Statistical test                                                            | $p$ -value ( $p < 0.05$ )                                                                                                                                                                                  |
|----------|-------------------|-----------------------------------|------------------------------------|-------------------------------------------------------------------------|-----------------------------------------------------------------------------|------------------------------------------------------------------------------------------------------------------------------------------------------------------------------------------------------------|
| Figure 1 | GEPIA2            | mRNA Expression level<br>Box plot | TCGA & GTEx projects               | Tumor ( $n = 461$ )<br>Normal ( $n = 558$ )                             | ANOVA<br>Empirical Bayes method<br>One-way ANOVA                            | $p = 3.5 \times 10^{-63}$                                                                                                                                                                                  |
| Figure 2 | GEPIA2            | Survival plot<br>(Overall)        | TCGA & GTEx projects               | High ( $n = 229$ )<br>Low ( $n = 229$ )                                 | Log rank test<br>(Mantel-Cox test)                                          | $p = 3.1 \times 10^{-4}$                                                                                                                                                                                   |
|          | TIMER 1.0         |                                   | TCGA                               | $n = 425$                                                               | Proportional hazards model                                                  | $p = 0 \times 10^{+00}$                                                                                                                                                                                    |
|          | TIMER 2.0         |                                   | TCGA cohorts                       | $n = 471$                                                               | Proportional hazards model                                                  | $p = 4.6 \times 10^{-2}$                                                                                                                                                                                   |
| Figure 3 | UALCAN            | Promoter methylation              | TCGA                               | Normal ( $n = 2$ )<br>Primary ( $n = 104$ )<br>Metastasis ( $n = 368$ ) | Student's t-test                                                            | Nor vs Pri ( $p = 4.23 \times 10^{-1}$ )<br>Nor vs Met ( $p = 5.95 \times 10^{-5}$ )<br>Pri vs Met ( $p = 9.15 \times 10^{-1}$ )                                                                           |
| Figure 4 | TISIDB            | Expression of immune cells        | gene set variation analysis (GSVA) | $n = 472$                                                               | Empirical bayes estimate                                                    | $p = 2.2 \times 10^{-6}$                                                                                                                                                                                   |
| Figure 5 | TIMER Version 1.0 | Correlation                       | TCGA                               | $n = 103$                                                               | Bayesian statistics<br>Gibbs sampling<br>Expectation maximization algorithm | KIR2DL3 ( $p = 1.79 \times 10^{-11}$ )<br>KIR3DL2 ( $p = 2.63 \times 10^{-70}$ )<br>KIR2DL4 ( $p = 7.41 \times 10^{-82}$ )<br>NCR1 ( $p = 3.39 \times 10^{-47}$ )<br>KNCR3 ( $p = 2.09 \times 10^{-119}$ ) |
| Figure 6 | TIMER Version 2.0 | Correlation                       | CIBERSORT                          | $n = 471$                                                               | Bayesian statistics<br>Gibbs sampling<br>Expectation maximization algorithm | Purity ( $p = 7.25 \times 10^{-72}$ )<br>Activated NK cells ( $p = 1.23 \times 10^{-16}$ )<br>Rested NK cells ( $p = 3.95 \times 10^{-17}$ )                                                               |
|          |                   |                                   | CIBERSORT-ABS                      |                                                                         | Bayesian statistics<br>Gibbs sampling<br>Expectation maximization algorithm | Purity ( $p = 7.25 \times 10^{-72}$ )<br>Activated NK cells ( $p = 3.49 \times 10^{-50}$ )<br>Rested NK cells ( $p = 6.91 \times 10^{-14}$ )                                                               |

|                              |                      |                                             |                         |                                         |                                                                                |                                                                                                                                                                                                                                                                                                                       |
|------------------------------|----------------------|---------------------------------------------|-------------------------|-----------------------------------------|--------------------------------------------------------------------------------|-----------------------------------------------------------------------------------------------------------------------------------------------------------------------------------------------------------------------------------------------------------------------------------------------------------------------|
| <b>Figure 7</b>              | TIMER<br>Version 1.0 | Correlation                                 | TCGA                    | $n = 103$                               | Bayesian statistics<br>Gibbs sampling<br>Expectation maximization<br>algorithm | GZMA ( $p = 6.04 \times 10^{-163}$ )<br>GZMB ( $p = 0 \times 10^{-00}$ )<br>PRF1 ( $p = 1.01 \times 10^{-146}$ )                                                                                                                                                                                                      |
| <b>Figure 8</b>              | cBioportal           | Co-expressed gene list                      | TCGA                    | -                                       | Clustering statistics                                                          | $IL2RG$ ( $p = 5.15 \times 10^{-174}$ )                                                                                                                                                                                                                                                                               |
|                              | UCSC Xena            | Correlation                                 | TCGA                    | $n = 481$                               |                                                                                | $IL32-IL2RG$ ( $p = 7.76 \times 10^{-213}$ )                                                                                                                                                                                                                                                                          |
|                              | R2                   | Correlation                                 | -                       | $n = 44$                                | Brute force t-test<br>One way ANOVA                                            | $IL32-IL2RG$ ( $p = 1.03 \times 10^{-9}$ )                                                                                                                                                                                                                                                                            |
| <b>Figure 9</b>              | Enricher             | GO biological<br>process                    | -                       | -                                       | Standard statistical method<br>Fisher's exact test<br>Hypergeometric test      | Biological process ( $p = 1.49 \times 10^{-5}$ )<br>Molecular Function ( $p = 8.19 \times 10^{-5}$ )<br>Cellular component ( $p = 3.44 \times 10^{-8}$ )                                                                                                                                                              |
| <b>Supplementary<br/>S4</b>  | OncoLnc              | Cox regression                              | -                       | -                                       | Cox proportional Hazards<br>model                                              | $p = 7.90 \times 10^{-4}$                                                                                                                                                                                                                                                                                             |
| <b>Supplementary<br/>S5</b>  | GEPIA2               | Survival plot<br>(Disease Free<br>Survival) | TCGA &<br>GTEx projects | High ( $n = 229$ )<br>Low ( $n = 229$ ) | Log rank test<br>(Mantel-Cox test)                                             | $p = 2.0 \times 10^{-1}$                                                                                                                                                                                                                                                                                              |
| <b>Supplementary<br/>S7</b>  | TIMER<br>Version 2.0 | Correlation (BRAF)                          | TCGA                    | $n = 465$                               | Bayesian statistics<br>Gibbs sampling<br>Expectation maximization<br>algorithm | $p = 6.4 \times 10^{-2}$                                                                                                                                                                                                                                                                                              |
| <b>Supplementary<br/>S8</b>  | TIMER<br>Version 1.0 | Correlation                                 | TCGA                    | $n = 103$                               | Bayesian statistics<br>Gibbs sampling<br>Expectation maximization<br>algorithm | Purity ( $p = 7.25 \times 10^{-72}$ )<br>B cell ( $p = 3.66 \times 10^{-11}$ )<br>CD8+ T cell ( $p = 1.05 \times 10^{-31}$ )<br>CD4+ T cell ( $p = 2.05 \times 10^{-22}$ )<br>Macrophage ( $p = 1.00 \times 10^{-10}$ )<br>Neutrophil ( $p = 1.32 \times 10^{-32}$ )<br>Dendritic cell ( $p = 6.01 \times 10^{-58}$ ) |
| <b>Supplementary<br/>S13</b> | GEPIA2               | Correlation                                 | TCGA &<br>GTEx projects | Tumor ( $n = 461$ )                     | Spearman correlation                                                           | CXCL9 ( $p = 1.7 \times 10^{-112}$ )<br>CXCL10 ( $p = 3.0 \times 10^{-77}$ )<br>CXCL11 ( $p = 3.0 \times 10^{-68}$ )                                                                                                                                                                                                  |

**Supplementary Table S3.** Tumor Abbreviations

| Abbreviation | Type of Cancer                                                   |
|--------------|------------------------------------------------------------------|
| ACC          | Adrenocortical carcinoma                                         |
| BLCA         | Bladder Urothelial Carcinoma                                     |
| BRCA         | Breast invasive carcinoma                                        |
| CESC         | Cervical squamous cell carcinoma and endocervical adenocarcinoma |
| CHOL         | Cholangio carcinoma                                              |
| COAD         | Colon adenocarcinoma                                             |
| DLBC         | Lymphoid Neoplasm Diffuse Large B-cell Lymphoma                  |
| ESCA         | Esophageal carcinoma                                             |
| GBM          | Glioblastoma multiforme                                          |
| HNSC         | Head and Neck squamous cell carcinoma                            |
| KICH         | Kidney Chromophobe                                               |
| KIRC         | Kidney renal clear cell carcinoma                                |
| KIRP         | Kidney renal papillary cell carcinoma                            |
| LAML         | Acute Myeloid Leukemia                                           |
| LGG          | Brain Lower Grade Glioma                                         |
| LIHC         | Liver hepatocellular carcinoma                                   |
| LUAD         | Lung squamous cell carcinoma                                     |
| MESO         | Mesothelioma                                                     |
| OV           | Ovarian serous cystadenocarcinoma                                |
| PAAD         | Pancreatic adenocarcinoma                                        |
| PCPG         | Pheochromocytoma and Paraganglioma                               |
| PRAD         | Prostate adenocarcinoma                                          |
| READ         | Rectum adenocarcinoma                                            |
| SARC         | Sarcoma                                                          |
| SKCM         | Skin Cutaneous Melanoma                                          |
| STAD         | Stomach adenocarcinoma                                           |
| TGCT         | Testicular Germ Cell Tumors                                      |
| THCA         | Thyroid carcinoma                                                |

**Supplementary Table S4.** Cox regression results for *IL32* with TCGA data in various types of cancers by OncoLnc. The data with  $p$ -value  $< 0.01$  are marked with red.

| Cancer | Cox Coefficient | $p$ -Value            | FDR Corrected         | Rank  | Median Expression | Mean Expression |
|--------|-----------------|-----------------------|-----------------------|-------|-------------------|-----------------|
| SKCM   | -0.224          | $7.90 \times 10^{-4}$ | $1.20 \times 10^{-2}$ | 1059  | 630.9             | 1326.15         |
| SARC   | -0.362          | $1.50 \times 10^{-3}$ | $4.07 \times 10^{-2}$ | 586   | 1220.88           | 2354.81         |
| PAAD   | 0.26            | $1.90 \times 10^{-2}$ | $1.06 \times 10^{-1}$ | 3030  | 4441.18           | 4962.08         |
| LIHC   | -0.168          | $8.30 \times 10^{-2}$ | $2.92 \times 10^{-1}$ | 4498  | 11949.06          | 21242.03        |
| UCEC   | -0.152          | $1.50 \times 10^{-1}$ | $9.68 \times 10^{-1}$ | 2492  | 2084.05           | 3466.36         |
| BLCA   | -0.104          | $1.70 \times 10^{-1}$ | $4.19 \times 10^{-1}$ | 6528  | 1100.77           | 2227.77         |
| BRCA   | -0.101          | $2.30 \times 10^{-1}$ | $6.10 \times 10^{-1}$ | 6186  | 904.08            | 1452.49         |
| OV     | -0.092          | $2.40 \times 10^{-1}$ | $7.95 \times 10^{-1}$ | 5005  | 810.49            | 1177.3          |
| LUAD   | 0.085           | $2.60 \times 10^{-1}$ | $5.04 \times 10^{-1}$ | 8573  | 2344.86           | 2989.48         |
| KIRP   | -0.161          | $2.90 \times 10^{-1}$ | $4.76 \times 10^{-1}$ | 9943  | 10570.44          | 12843.81        |
| HNSC   | -0.073          | $3.10 \times 10^{-1}$ | $6.43 \times 10^{-1}$ | 7923  | 2205.22           | 3464.29         |
| GBM    | 0.092           | $3.30 \times 10^{-1}$ | $8.85 \times 10^{-1}$ | 6182  | 346.67            | 436.5           |
| KIRC   | -0.078          | $3.40 \times 10^{-1}$ | $4.71 \times 10^{-1}$ | 12002 | 7784.6            | 9252.17         |
| CESC   | -0.108          | $3.80 \times 10^{-1}$ | $7.11 \times 10^{-1}$ | 8667  | 3097.67           | 4733.14         |
| LUSC   | 0.062           | $3.80 \times 10^{-1}$ | $8.17 \times 10^{-1}$ | 7818  | 1318.88           | 2071.46         |
| LGG    | 0.062           | $5.10 \times 10^{-1}$ | $6.07 \times 10^{-1}$ | 14107 | 155.38            | 260.48          |
| READ   | -0.114          | $6.10 \times 10^{-1}$ | $9.77 \times 10^{-1}$ | 10215 | 5257.51           | 5898.36         |
| LAML   | -0.058          | $6.40 \times 10^{-1}$ | $8.71 \times 10^{-1}$ | 11143 | 176.05            | 295.76          |
| STAD   | -0.038          | $6.40 \times 10^{-1}$ | $8.82 \times 10^{-1}$ | 12202 | 2537.94           | 3540.33         |
| COAD   | -0.043          | $6.90 \times 10^{-1}$ | $9.02 \times 10^{-1}$ | 12490 | 5428.92           | 6129.97         |
| ESCA   | -0.04           | $7.70 \times 10^{-1}$ | $9.85 \times 10^{-1}$ | 13041 | 1322.23           | 1910.35         |

**Supplementary Figure S5.** Correlation between *IL32* expression and disease free survival (DFS) of various types of cancers by GEPIA2. (log-rank  $p < 0.05$ )

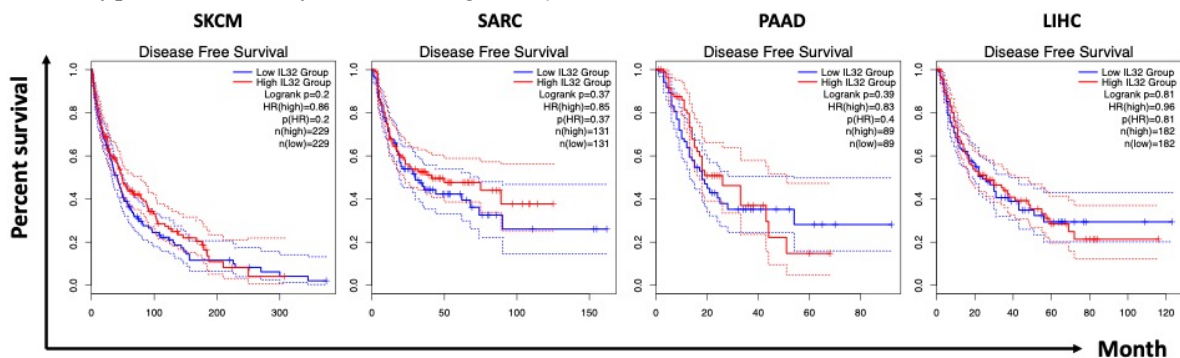

**Supplementary Table S6.** Fifteen mutations in the *IL32* gene by cBioportal.

| Sample ID       | Protein Change | Mutation Type | Copy #     | Allele Freq (T) | # Mut in Sample |
|-----------------|----------------|---------------|------------|-----------------|-----------------|
| TCGA-W3-AA1W-06 | X10_splice     | Splice        | Diploid    | 0.19            | 586             |
| TCGA-W3-AA1V-06 | R70K           | Missense      | Diploid    | 0.57            | 4559            |
| TCGA-W3-AA1V-06 | P224L          | Missense      | Diploid    | 0.09            | 4559            |
| TCGA-FW-A3R5-06 | S133F          | Missense      | ShallowDel | 0.17            | 15825           |
| TCGA-FW-A3R5-06 | D140N          | Missense      | ShallowDel | 0.29            | 15825           |
| TCGA-FW-A3R5-06 | M155I          | Missense      | ShallowDel | 0.28            | 15825           |
| TCGA-FS-A1ZZ-06 | S34L           | Missense      | Diploid    | 0.45            | 1530            |
| TCGA-ER-A193-06 | K234I          | Missense      | ShallowDel | 0.31            | 1700            |
| TCGA-EE-A2MS-06 | K121*          | Nonsense      | Diploid    | 0.25            | 2462            |
| TCGA-EE-A2GO-06 | T38I           | Missense      | ShallowDel | 0.28            | 1909            |
| TCGA-EE-A17X-06 | F150S          | Missense      | Diploid    | 0.26            | 680             |
| TCGA-D9-A6EC-06 | F3V            | Missense      | ShallowDel | 0.3             | 3676            |
| TCGA-D3-A51F-06 | X10_splice     | Splice        | Diploid    | 0.06            | 103             |
| TCGA-D3-A2JF-06 | P53L           | Missense      | Diploid    | 0.43            | 1213            |
| TCGA-D3-A2J8-06 | X10_splice     | Splice        | Diploid    | 0.1             | 953             |

**Supplementary Figure S7.** Correlation *IL32* expression and BRAF mutation status in SKCM by TIMER v.2.0. ( $p < 0.05$ )

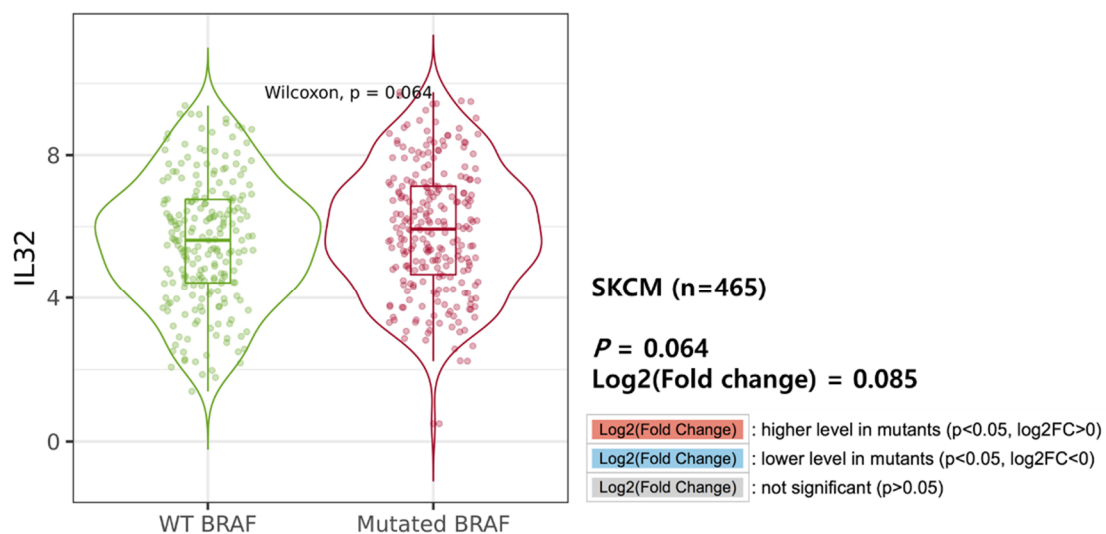

**Supplementary Figure S8.** Correlation of *IL32* expression with immune cell infiltration level in SKCM and LIHC. (TIMER v.1.0) ( $p < 0.05$ )

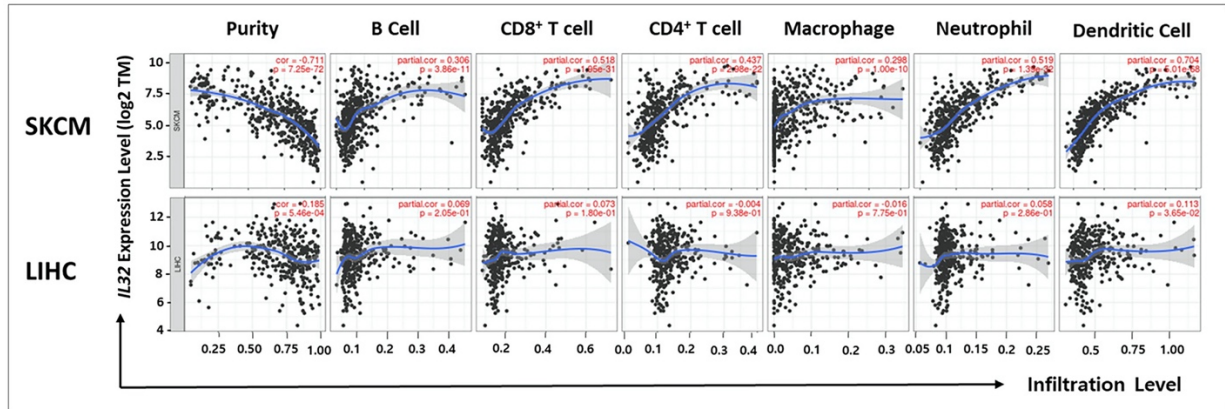

**Supplementary Figure S9.** Correlations between *IL32* expression and NK cells of various types of cancers by TISIDB. ( $p < 0.05$ )

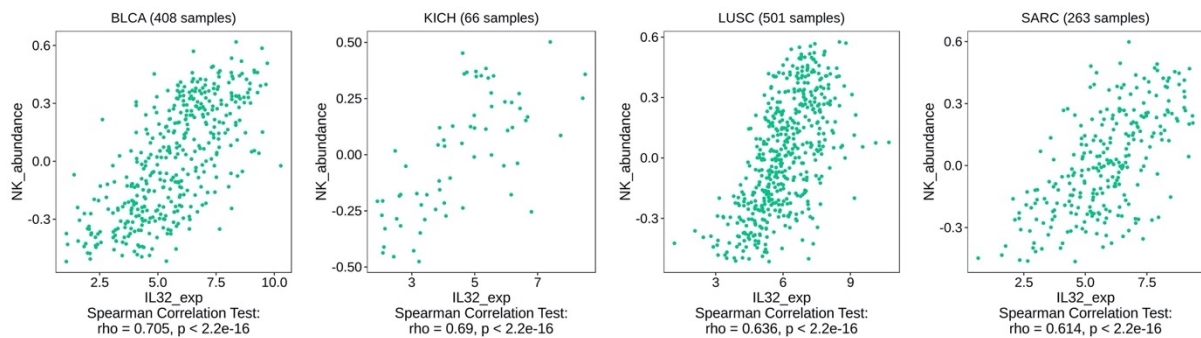

**Supplementary Table S10.** Correlation analysis between *IL32* and gene markers of immune cells using TIMER (v.1.0).

| Description         | Gene markers   | SKCM  |     |        |     | LIHC   |      |        |      |
|---------------------|----------------|-------|-----|--------|-----|--------|------|--------|------|
|                     |                | None  |     | Purity |     | None   |      | Purity |      |
|                     |                | Cor   | P   | Cor    | P   | Cor    | P    | Cor    | P    |
| Natural killer cell | <i>KIR2DL1</i> | 0.459 | *** | 0.32   | *** | -0.048 | 0.35 | -0.066 | 0.23 |
|                     | <i>KIR2DL3</i> | 0.621 | *** | 0.46   | *** | -0.014 | 0.78 | -0.051 | 0.35 |
|                     | <i>KIR2DL4</i> | 0.737 | *** | 0.63   | *** | 0.073  | 0.16 | 0.038  | 0.49 |
|                     | <i>KIR3DL1</i> | 0.618 | *** | 0.49   | *** | 0.006  | 0.91 | -0.028 | 0.60 |
|                     | <i>KIR3DL2</i> | 0.699 | *** | 0.55   | *** | 0.046  | 0.38 | -0.022 | 0.68 |
|                     | <i>KIR3DL3</i> | 0.243 | *** | 0.19   | *** | 0.000  | 1.00 | -0.022 | 0.68 |
|                     | <i>KIR2DS4</i> | 0.513 | *** | 0.40   | *** | -0.047 | 0.37 | -0.059 | 0.27 |
|                     | <i>NCR1</i>    | 0.599 | *** | 0.487  | *** | -0.002 | 0.97 | -0.065 | 0.22 |
|                     | <i>NCR3</i>    | 0.827 | *** | 0.712  | *** | 0.218  | ***  | 0.137  | ***  |

|                         |                            |        |       |       |       |        |       |        |       |
|-------------------------|----------------------------|--------|-------|-------|-------|--------|-------|--------|-------|
| CD8 <sup>+</sup> T cell | <i>CD8A</i>                | 0.869  | 0     | 0.80  | ***   | 0.170  | ***   | 0.081  | 0.135 |
|                         | <i>CD8B</i>                | 0.882  | ***   | 0.81  | ***   | 0.138  | ***   | 0.044  | 0.412 |
| Treg                    | <i>FOXP3</i>               | 0.809  | ***   | 0.68  | ***   | 0.057  | 0.274 | 0.023  | 0.664 |
|                         | <i>CCR8</i>                | 0.720  | ***   | 0.59  | ***   | 0.143  | ***   | 0.075  | 0.165 |
|                         | <i>STAT5B</i>              | 0.230  | ***   | 0.14  | ***   | -0.204 | ***   | -0.177 | ***   |
|                         | <i>TGFβ(TGFB1)</i>         | 0.472  | 0     | 0.31  | ***   | 0.006  | 0.901 | -0.111 | ***   |
| TAM                     | <i>CCL2</i>                | 0.624  | 0     | 0.45  | ***   | 0.205  | ***   | 0.126  | ***   |
|                         | <i>CD68</i>                | 0.516  | 0     | 0.33  | ***   | 0.179  | ***   | 0.105  | ***   |
|                         | <i>IL10</i>                | 0.610  | ***   | 0.43  | ***   | 0.117  | ***   | 0.012  | 0.817 |
| T cell(general)         | <i>CD3D</i>                | 0.932  | ***   | 0.88  | ***   | 0.172  | ***   | 0.251  | ***   |
|                         | <i>CD3E</i>                | 0.938  | 0     | 0.89  | ***   | 0.263  | ***   | 0.176  | ***   |
|                         | <i>CD2</i>                 | 0.923  | 0     | 0.87  | ***   | 0.293  | ***   | 0.214  | ***   |
| B cell                  | <i>CD19</i>                | 0.683  | ***   | 0.56  | ***   | 0.112  | ***   | 0.040  | 0.46  |
|                         | <i>CD79A</i>               | 0.749  | 0     | 0.63  | ***   | 0.106  | ***   | -0.003 | 0.96  |
| Monocyte                | <i>CD86</i>                | 0.806  | 0     | 0.68  | ***   | 0.210  | ***   | 0.122  | ***   |
|                         | <i>CD115(CSF1R)</i>        | 0.738  | ***   | 0.60  | ***   | 0.241  | ***   | 0.145  | ***   |
| M1<br>Macrophage        | <i>INOS(NOS2)</i>          | 0.030  | 0.519 | 0.03  | 0.511 | -0.003 | 0.95  | -0.012 | 0.82  |
|                         | <i>IRF5</i>                | 0.654  | 0     | 0.45  | ***   | 0.031  | 0.55  | 0.033  | 0.54  |
|                         | <i>COX2(PTGS2)</i>         | 0.014  | 0.706 | -0.11 | ***   | 0.123  | ***   | 0.032  | 0.56  |
| M2<br>Macrophage        | <i>CD163</i>               | 0.586  | 0     | 0.42  | ***   | 0.082  | 0.13  | 0.181  | ***   |
|                         | <i>VSIG4</i>               | 0.607  | 0     | 0.47  | ***   | 0.233  | ***   | 0.156  | ***   |
|                         | <i>MS4A4A</i>              | 0.670  | 0     | 0.51  | ***   | 0.248  | ***   | 0.166  | ***   |
| Neutrophils             | <i>CD66b(CEACA<br/>M8)</i> | -0.061 | 0.184 | -0.04 | 0.461 | -0.070 | 0.18  | -0.098 | ***   |
|                         | <i>CD11b(ITGAM)</i>        | 0.652  | 0     | 0.53  | ***   | 0.342  | ***   | 0.284  | ***   |
|                         | <i>CCR7</i>                | 0.821  | ***   | 0.69  | ***   | 0.188  | ***   | 0.092  | ***   |
| Dendritic<br>cell       | <i>HLA-DPB1</i>            | 0.857  | 0     | 0.75  | ***   | 0.269  | ***   | 0.191  | ***   |
|                         | <i>HLA-DQB1</i>            | 0.792  | 0     | 0.66  | ***   | 0.246  | ***   | 0.168  | ***   |
|                         | <i>HLA-DRA</i>             | 0.847  | ***   | 0.74  | ***   | 0.287  | ***   | 0.215  | ***   |
|                         | <i>HLA-DPA1</i>            | 0.824  | 0     | 0.73  | ***   | 0.267  | ***   | 0.190  | ***   |
|                         | <i>BDCA-1(CD1C)</i>        | 0.616  | ***   | 0.42  | ***   | 0.105  | ***   | 0.032  | 0.55  |
|                         | <i>CD11c(ITGAX)</i>        | 0.636  | ***   | 0.43  | ***   | 0.234  | ***   | 0.163  | ***   |

SKCM, skin cutaneous melanoma; LIHC, liver hepatocellular carcinoma; Treg, regulatory T cell; TAM, tumor-associated macrophage; Th, T helper cell; Tfh, follicular helper T cell; Cor, *P* value of Spearman's correlation; None, correlation without adjustment. Purity and correlation adjusted by purity \**P* < 0.01; \*\**P* < 0.001; \*\*\**P* < 0.0001.



**Supplementary Table S11.** Correlation constants and  $p$ -values in Figure 5 (TIMER v.1.0) ( $p < 0.05$ )

| Gene markers |                | SKCM  |                         | LIHC   |                       |
|--------------|----------------|-------|-------------------------|--------|-----------------------|
|              |                | Cor   | $p$                     | Cor    | $p$                   |
| NK Cell      | <i>KIR2DL3</i> | 0.621 | $1.79 \times 10^{-51}$  | -0.014 | $7.81 \times 10^{-1}$ |
|              | <i>KIR3DL2</i> | 0.699 | $2.63 \times 10^{-70}$  | 0.046  | $3.82 \times 10^{-1}$ |
|              | <i>KIR2DL4</i> | 0.737 | $7.41 \times 10^{-82}$  | 0.073  | $1.59 \times 10^{-1}$ |
|              | <i>NCR1</i>    | 0.599 | $3.39 \times 10^{-47}$  | -0.002 | $9.73 \times 10^{-1}$ |
|              | <i>NCR3</i>    | 0.827 | $2.09 \times 10^{-119}$ | 0.218  | $2.32 \times 10^{-5}$ |

**Supplementary Table S12.** Correlation constants and  $p$ -values in Figure 7 (TIMER v.1.0) ( $p < 0.05$ )

| Gene markers |             | SKCM  |                         | LIHC  |                       |
|--------------|-------------|-------|-------------------------|-------|-----------------------|
|              |             | Cor   | $p$                     | Cor   | $p$                   |
|              | <i>GZMA</i> | 0.891 | $6.04 \times 10^{-163}$ | 0.271 | $1.16 \times 10^{-7}$ |
|              | <i>GZMB</i> | 0.869 | 0E + 00                 | 0.029 | $5.8 \times 10^{-1}$  |
|              | <i>PRF1</i> | 0.871 | $1.01 \times 10^{-46}$  | 0.095 | $6.77 \times 10^{-2}$ |

**Supplementary Figure S13.** Correlations between *IL32* expression and chemokines (CXCL 9,10,11) in SKCM by GEPIA2. ( $p < 0.05$ )

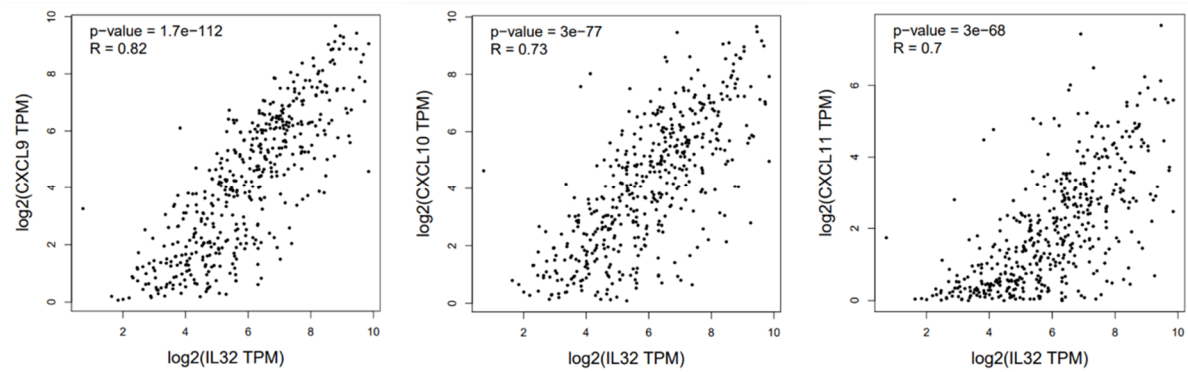

Supplement: s1 [file s1]
